# Supplementary material for: Novel Ag3PO4/CeO2composite with high efficiency and stability for photocatalytic applications
Source: Royal Society of Chemistry journal article supplement (doi:10.1039/c3ta14286h), 2013-11-06
Supplement: c3ta14286h.pdf [file c3ta14286h.pdf]

Electronic Supplementary Material (ESI) for Journal of Materials Chemistry A

**Supporting Information**

**Novel Ag<sub>3</sub>PO<sub>4</sub>/CeO<sub>2</sub> composite with high efficiency and stability for  
photocatalytic application**

Zheng-Mei Yang, Gui-Fang Huang\*, Wei-Qing Huang<sup>#</sup>, Jia-Mou Wei, Xin-Guo Yan, Yue-Yang Liu,  
Chao Jiao, Zhuo Wan, Anlian Pan

Department of Applied Physics, Key Laboratory for Micro-Nano Physics and Technology of Hunan  
Province, Hunan University, Changsha 410082, China

\* Corresponding author. *E-mail address:* ghuang@hnu.edu.cn

<sup>#</sup> Corresponding author. *E-mail address:* wqhuang@hnu.edu.cn

Electronic Supplementary Material (ESI) for Journal of Materials Chemistry A

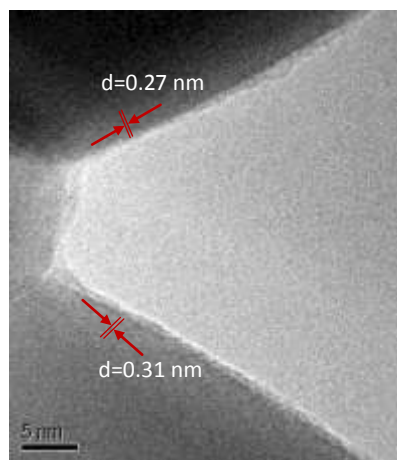

Fig. S1. HRTEM image taken from  $\text{Ag}_3\text{PO}_4/\text{CeO}_2$  composite

Electronic Supplementary Material (ESI) for Journal of Materials Chemistry A

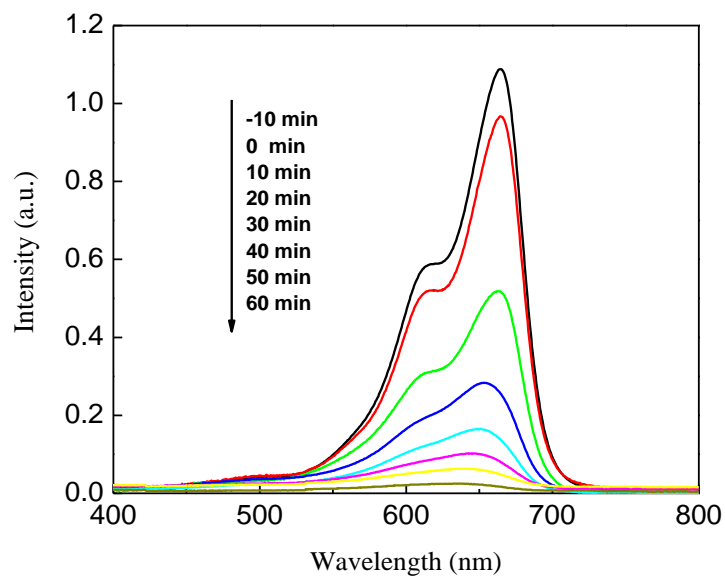

Fig. S2. Absorption spectra of MB solution in the presence of  $\text{Ag}_3\text{PO}_4/\text{CeO}_2$  composite photocatalyst under visible light irradiation.
